# Supplementary material for: “Delocalized π-bond” guided pyramidal nanocrystal superstructures for excellent light trapping in SERS
Source: Royal Society of Chemistry journal article supplement (doi:10.1039/d4qm00576g), 2024-10-29
Supplement: d4qm00576g1.pdf [file d4qm00576g1.pdf]

## Supporting Information

### **“Delocalized $\pi$ -bonds” Guided Pyramidal Nanocrystal Superstructures for Excellent Light Trapping in SERS**

Yang Shang,<sup>a</sup> Bo Ren,<sup>a</sup> Xiaotian Wang,<sup>\*c</sup> and Jie Lin<sup>\*b</sup>

<sup>a</sup> Key Laboratory of Advanced Functional Materials, Ministry of Education, College of Materials Science and Engineering, Beijing University of Technology, Beijing, 100124, P. R. China

<sup>b</sup> Ningbo Institute of Materials Technology and Engineering, Chinese Academy of Science, 1219 Zhongguan West Road, Ningbo, 315201 China

Email: linjie@nimte.ac.cn

<sup>c</sup> School of Chemistry, Beijing Advanced Innovation Center for Biomedical Engineering, Key Laboratory of Bio-Inspired Smart Interfacial Science and Technology, Beihang University, Beijing100191, China

Email: wangxt@buaa.edu.cn

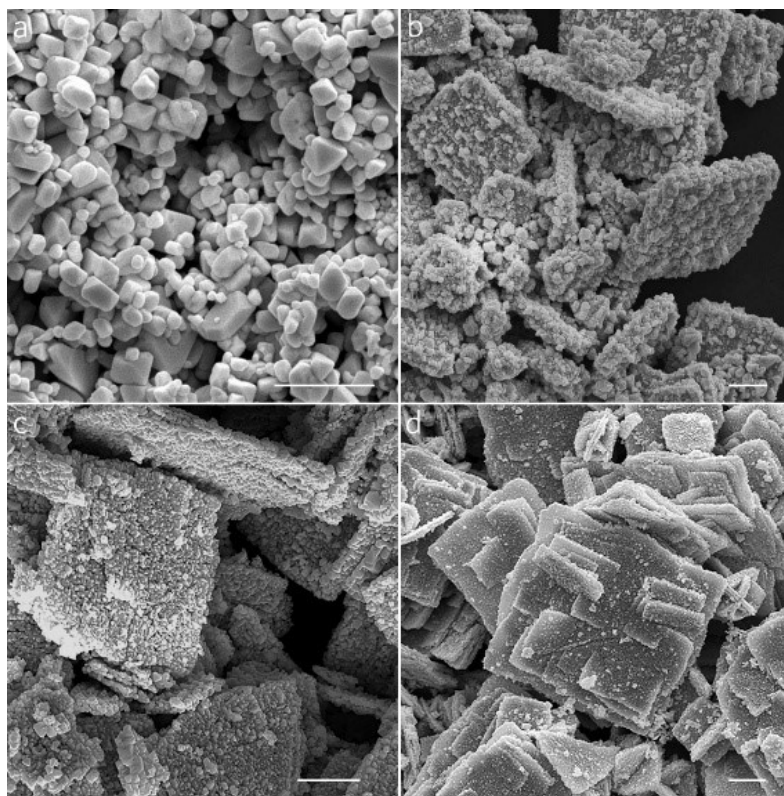

**Fig. S1** SEM images of CuI samples obtained with different I<sup>-</sup> concentrations. Scale bar = 2 μm.  
(a) 0.0089, (b) 0.0178, (c) 0.0268 and (d) 0.0357 M.

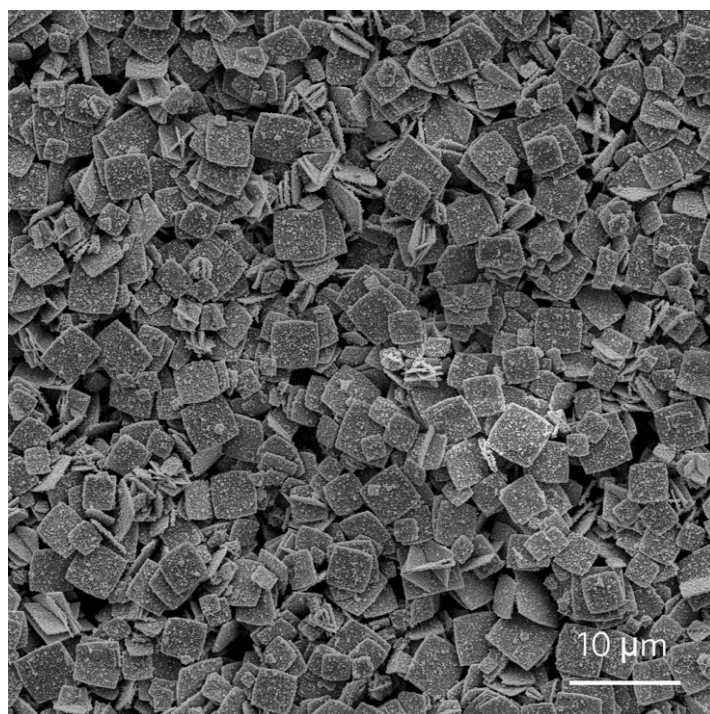

**Fig. S2** Broad view SEM image of the CuI superstructure.

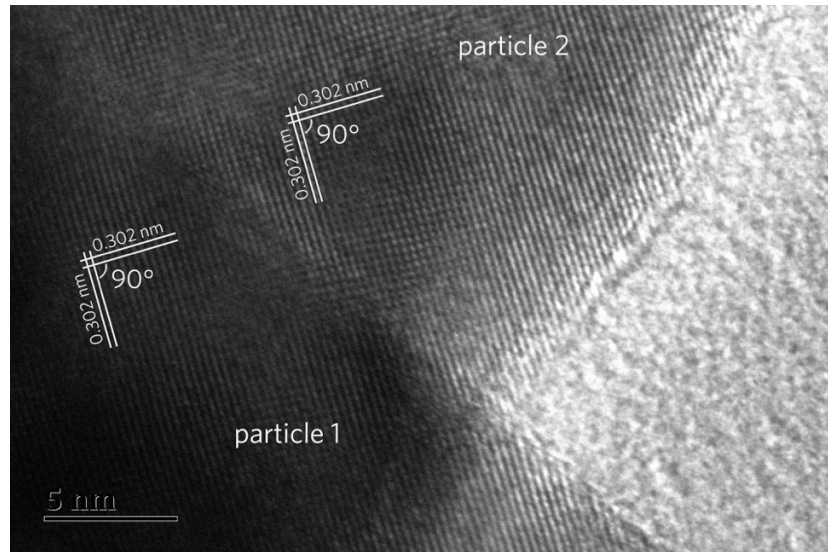

**Fig. S3** The overall HRTEM image of Fig. 2f. The image demonstrated the identical crystallographic orientations of adjacent CuI quasi-octahedra.

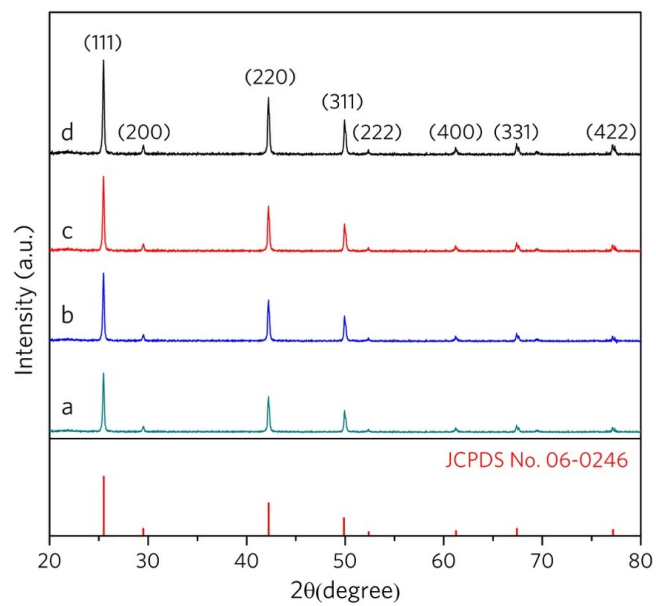

**Fig. S4** (a~c) XRD patterns of the intermediates during the growth of the CuI superstructures collected at different duration time: (a) 0 min, (b) 30 min, (c) 60 min and (d) XRD pattern of the as-synthesized CuI superstructure with reaction for 120 min. All the products can be well indexed to the standard data for cubic CuI with JCPDS No. 06-0246.

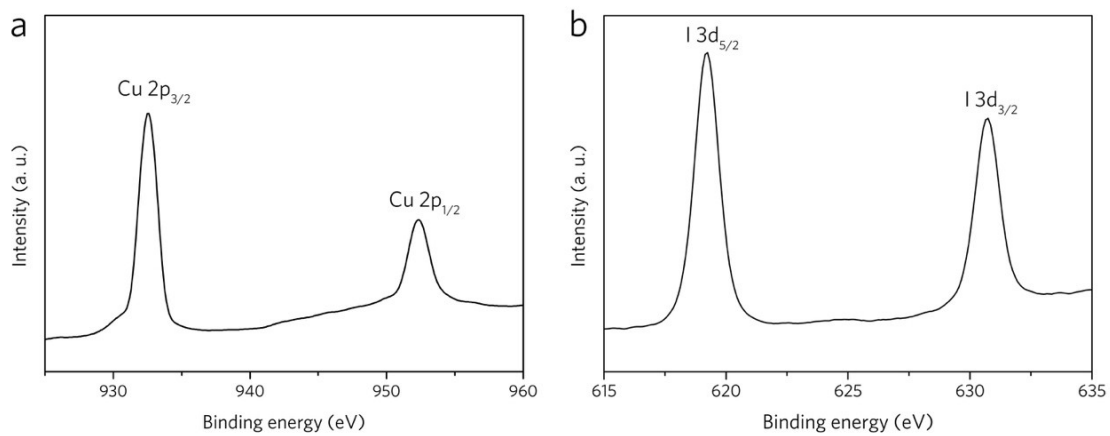

**Fig. S5** XPS spectra of the as-prepared samples of CuI. It is observed that two strong peaks at 932.1 and 952.0 eV in Cu  $2p$  spectrum, and two strong peaks at 619.5 and 952.0 eV in I  $3d$  spectrum.

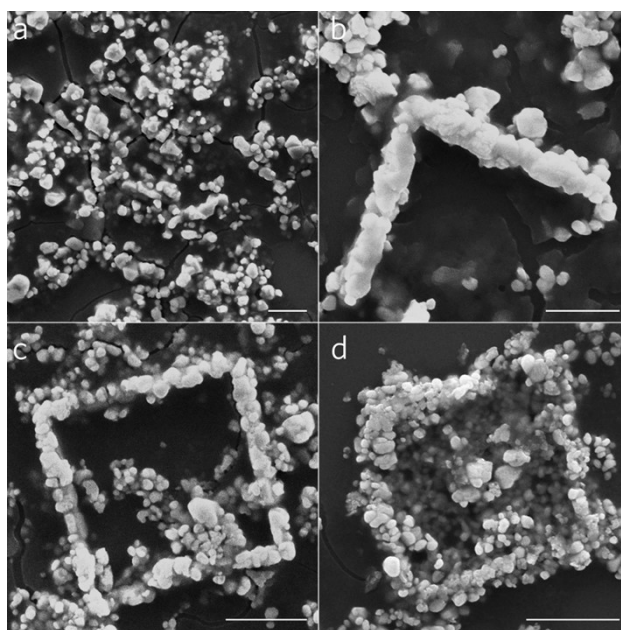

**Fig. S6** SEM image of the intermediates during the growth of the CuI superstructures collected at different duration time: (a) 0, (b) 30, (c) 60 and (d) 90 min.

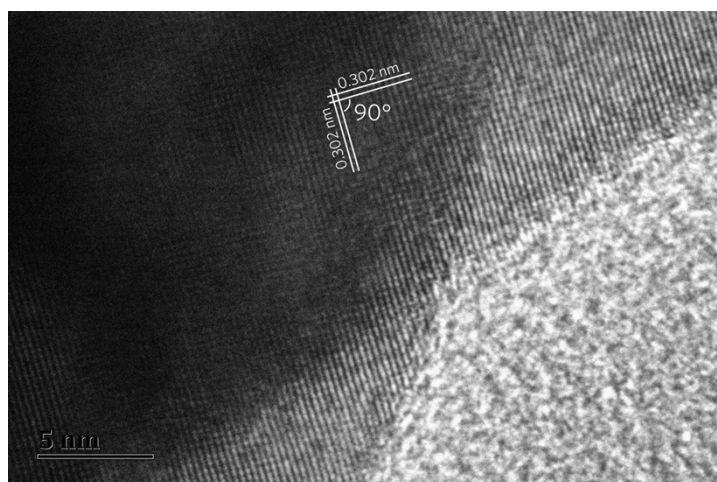

**Fig. S7** The HRTEM image of boundary region in the red frame of Fig. 3b1. It showed a vertical set of lattice fringes of 0.302 nm for CuI quasi-octahedron subunit, which coincident well with the (200) plane of the cubic CuI. Remarkably, the identical crystallographic orientations on the edges of adjacent CuI quasi-octahedra (Fig. 3b1) suggested the uniform crystallographic orientations of the CuI frame.



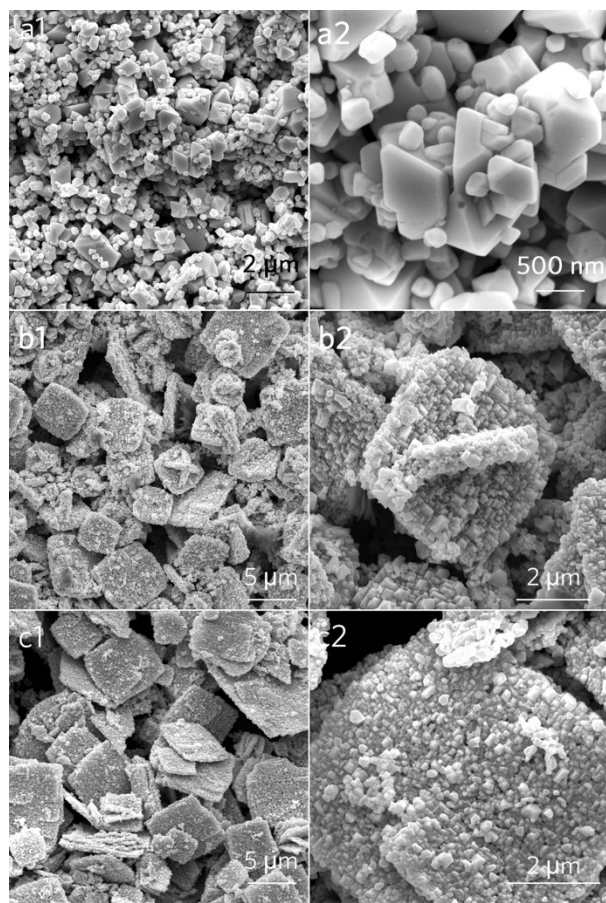

**Fig. S8** SEM images of CuI samples obtained with different P123 concentrations. (a1, a2) 0, (b1, b2) 0.1, and (c1, c2) 0.4 M.

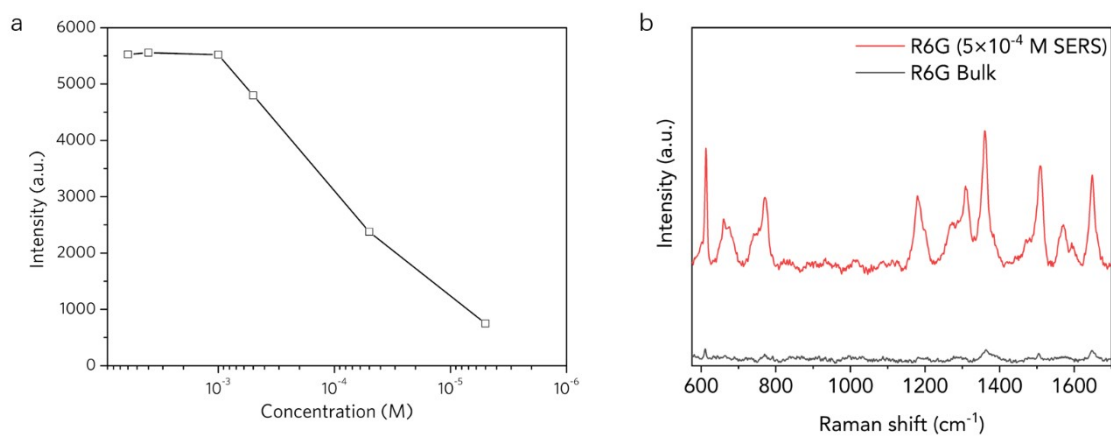

**Fig. S9** (a) The relationship of peak intensities at 610 cm<sup>-1</sup> and concentrations of R6G adsorbed on CuI superstructure single particle. (b) Black line is normal Raman spectrum of solid R6G, red line is SERS spectrum of R6G ( $5 \times 10^{-4}$  M) adsorbed on CuI superstructure single particle. Laser wavelength: 647 nm; power: 3.0 mW; lens: 50 × objective; acquisition time: 2 s.

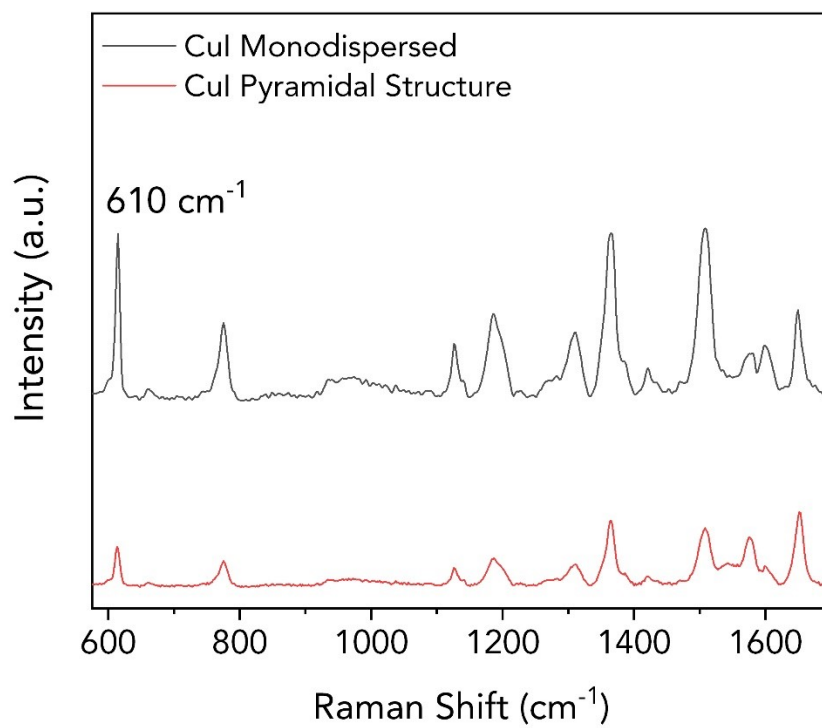

**Fig. S10** SERS of R6G spectra ( $10^{-4}$  M) adsorbed on CuI superstructure and monodispersed octahedra by 647 nm excitation wavelength.

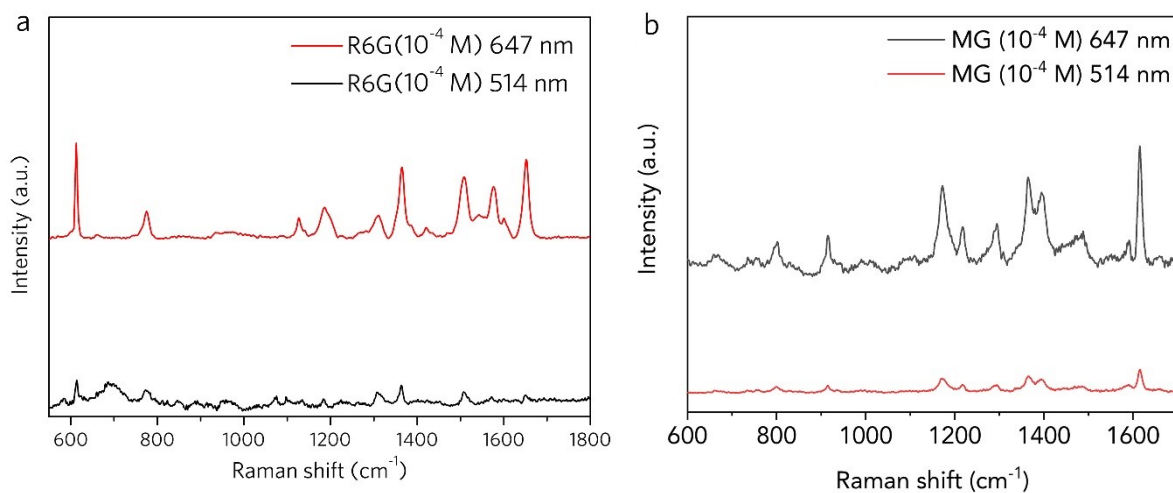

**Fig. S11** (a) SERS of R6G spectra ( $10^{-4}$  M) adsorbed on CuI superstructure single particle by 514.5 nm excitation wavelength (black line) and 647 nm excitation wavelength (red line). (b) SERS of MG spectra ( $10^{-4}$  M) adsorbed on CuI superstructure single particle by 514.5 nm excitation wavelength (red line) and 647 nm excitation wavelength (black line).

The SERS spectra of R6G and MG ( $10^{-4}$  M) adsorbed on CuI superstructure by 647 nm laser was obviously better than that of 514.5 nm under the same condition.

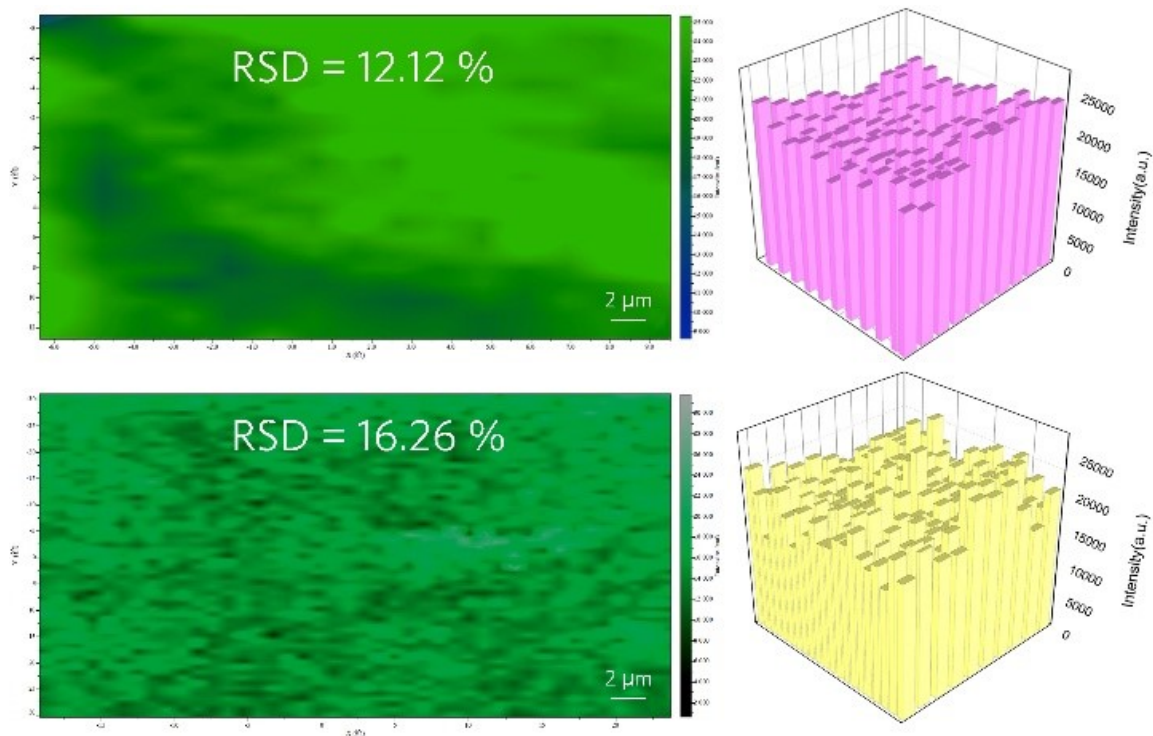

**Fig. S12** Raman mapping images of the main vibration modes (a) R6G at 610 cm<sup>-1</sup> and (c) MG at 1170 cm<sup>-1</sup> recorded on a 30 × 30 μm area, and the corresponding intensity of the peaks in the area spots, respectively. The concentrations of R6G and MG is 10<sup>-4</sup> M.

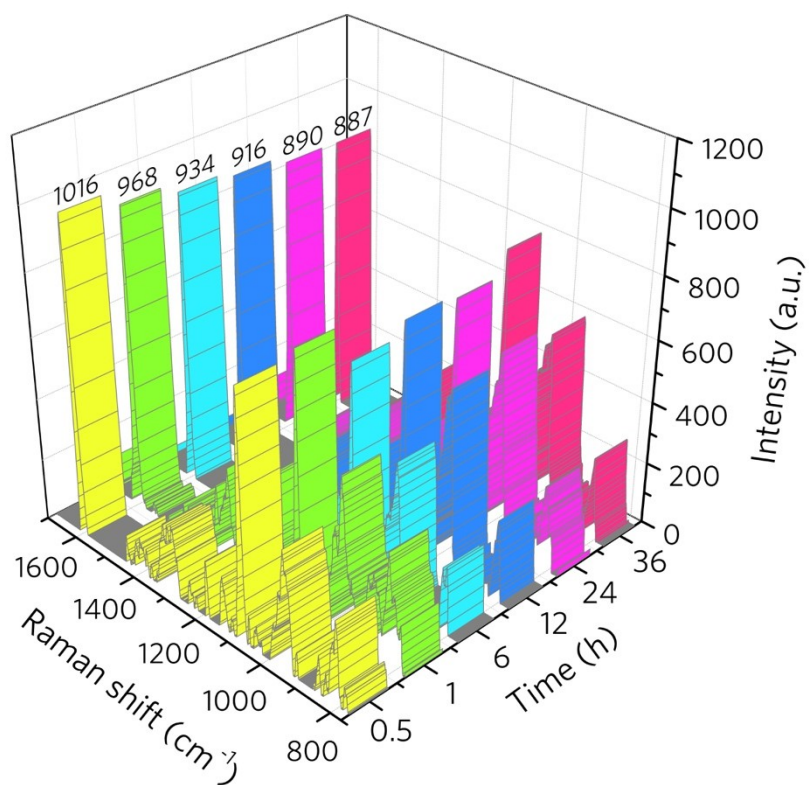

**Fig. S13** Raman mapping images of the main vibration modes (a) R6G at  $610\text{ cm}^{-1}$  and (c) MG at  $1170\text{ cm}^{-1}$  recorded on a  $30 \times 30\text{ }\mu\text{m}$  area, and the corresponding intensity of the peaks in the area spots, respectively. The concentrations of R6G and MG is  $10^{-4}\text{ M}$ .

**Supplementary Table 1:** Comparing with semiconductors and noble metals SERS activity by literatures.

| Materials                                | Analyte        | EF                 | LOD (M)            | Laser (nm) | Ref                 |
|------------------------------------------|----------------|--------------------|--------------------|------------|---------------------|
| CuI Pyramidal Structures                 | CV             | $2.8 \times 10^5$  | $10^{-7}$          | 647        | This work           |
| H-Si nanowire/ H-Ge nanotube             | R6G/N719       | 8-28               | $10^{-6}$          | 532        | Ref <sup>[1]</sup>  |
| TiO <sub>2</sub> microarrays             | Methylene Blue | $2 \times 10^4$    | $6 \times 10^{-6}$ | 532        | Ref <sup>[2]</sup>  |
| TiO <sub>2</sub> nanoparticles           | Dopamine       | $10^3$             | $4 \times 10^{-2}$ | 442        | Ref <sup>[3]</sup>  |
| Cu <sub>2</sub> O nanospheres            | 4-MBA          | $10^5$             | $10^{-3}$          | 488        | Ref <sup>[4]</sup>  |
| Cu <sub>2</sub> O nanostructure          | 4-ATP          | $3.5 \times 10^4$  | $10^{-7}$          | 532        | Ref <sup>[5]</sup>  |
| ZnO Superstructures                      | 4-MPY          | $10^5$             | -                  | 532        | Ref <sup>[6]</sup>  |
| WS <sub>2</sub>                          | R6G            | $2.5 \times 10^4$  | $10^{-7}$          | 532        | Ref <sup>[7]</sup>  |
| Partially oxidized MoS <sub>2</sub>      | R6G            | $1.4 \times 10^5$  | $10^{-7}$          | 532        | Ref <sup>[7]</sup>  |
| Li-MoS <sub>2</sub>                      | R6G            | $1.73 \times 10^4$ | $10^{-7}$          | 532        | Ref <sup>[8]</sup>  |
| Amorphous Rh <sub>3</sub> S <sub>6</sub> | R6G            | $1.02 \times 10^5$ | $10^{-7}$          | 647        | Ref <sup>[9]</sup>  |
| few-layer MoS <sub>2</sub>               | R6G            | $7.68 \times 10^2$ | $10^{-8}$          | 532        | Ref <sup>[10]</sup> |
| Ni(OH) <sub>2</sub> microcages           | MB             | $2.35 \times 10^3$ | $10^{-7}$          | 532        | Ref <sup>[11]</sup> |

## Reference

- [1] X. Wang, W. Shi, G. She, L. Mu, *J. Am. Chem. Soc.* **2011**, 133, 16518.
- [2] D. Qi, L. Lu, L. Wang, J. Zhang, *J. Am. Chem. Soc.* **2014**, 136, 9886.
- [3] A. Musumeci, D. Gosztola, T. Schiller, N. M. Dimitrijevic, V. Mujica, D. Martin, T. Rajh, *J. Am. Chem. Soc.* **2009**, 131, 6040.
- [4] L. Jiang, T. You, P. Yin, Y. Shang, D. Zhang, L. Guo, S. Yang, *Nanoscale* **2013**, 5, 2784.
- [5] C. Qiu, L. Zhang, H. Wang, C. Jiang, *J. Phys. Chem. Lett.* **2012**, 3, 651.
- [6] W. Ji, L. Li, W. Song, X. Wang, B. Zhao, Y. Ozaki, *Angew. Chem. Int. Ed.* **2019**, 58, 14452.
- [7] Z. Zheng, S. Cong, W. Gong, J. Xuan, G. Li, W. Lu, F. Geng, Z. Zhao, *Nat. Commun.* **2017**, 8, 1993.
- [8] E. Er, H.-L. Hou, A. Criado, J. Langer, M. Möller, N. Erk, L. M. Liz-Marzán, M. Prato, *Chem. Mater.* **2019**, 31, 5725.
- [9] A. Li, J. Lin, Z. Huang, X. Wang, L. Guo, *iScience* **2018**, 10, 1.
- [10] B. P. Majee, S. Mishra, R. K. Pandey, R. Prakash, A. K. Mishra, *J. Phys. Chem. C* **2019**, 123, 18071.
- [11] M. Gao, P. Miao, X. Han, C. Sun, Y. Ma, Y. Gao, P. Xu, *Inorg. Chem. Front.* **2019**, 6, 2318.
